# Supplementary material
Source: Royal Society of Chemistry journal article supplement (doi:10.1039/d6cp00133e)
Supplement: d6cp00133e1.pdf [file d6cp00133e1.pdf]

## Supplementary Information

# Interfacial Effects in Janus HfSSe/SnSSe van der Waals Heterostructure: Synergistic Enhancement of Optical Absorption and Thermoelectric Performance

Ali Shahzad<sup>1</sup>, Santunu Purohit<sup>1</sup> and Lin Zhu<sup>1\*</sup>

<sup>1</sup>School of Physics and Wuhan National High Magnetic Field Center, Huazhong University of Science and Technology, Wuhan 430074, China

\*Author to whom correspondence should be addressed: [linzh@hust.edu.cn](mailto:linzh@hust.edu.cn)

## Section I. Computational Methods

The computational reliability of our first-principles calculations was rigorously verified through systematic convergence tests. First, the plane-wave cutoff energy (ENCUT) and the electronic self-consistency criterion (EDIFF) were tested. Total energy calculations performed with cutoff energies ranging from 400 eV to 500 eV, in conjunction with a stricter convergence criterion of  $10^{-6}$  eV, demonstrated excellent convergence. The maximum energy variation was found to be less than 7.36 meV, confirming that the chosen parameters of ENCUT = 400 eV and EDIFF =  $10^{-5}$  eV are sufficient to yield reliable and well-converged results.

To ensure the accuracy of the calculated optical properties, extensive convergence tests were conducted with respect to several key parameters: the number of empty bands (NBANDS), the k-point sampling mesh, the smearing method, and the plane-wave cutoff energy. The final optical calculations employed ENCUT = 400 eV and Gaussian smearing (ISMEAR = 0) with a width of SIGMA = 0.05 eV. Tests on the number of bands compared NBANDS = 75 and 100, while k-point meshes of  $7 \times 7 \times 1$  and  $9 \times 9 \times 1$  were evaluated. The optical absorption spectra showed negligible changes in both peak positions and intensities when NBANDS  $\geq 75$  and a  $9 \times 9 \times 1$  k-point mesh was used. Consequently, NBANDS = 75 and a  $9 \times 9 \times 1$   $\Gamma$ -centered k-grid were selected for all production calculations of optical properties.

The optical absorption spectra were computed using the GW+Bethe-Salpeter equation (GW+BSE) method to explicitly account for electron-hole (excitonic) interactions, which are crucial for accurately describing the optical response of two-dimensional materials. The computational workflow involved successive steps of structural relaxation, self-consistent field (SCF) calculation, exact diagonalization,  $GW_0$  calculation, and finally the BSE calculation, utilizing the generated WAVECAR and WAVEDER files.

Lattice thermal conductivity ( $\kappa_l$ ) was calculated using second- and third-order interatomic force constants (IFCs), computed with  $4 \times 4 \times 1$  and  $3 \times 3 \times 1$  supercells respectively. Both calculations used a  $3 \times 3 \times 1$  k-point mesh and a real-space interaction cutoff radius of 4.6 Å. The phonon Boltzmann transport equation was then solved with the ShengBTE code, using a dense  $60 \times 60 \times 1$  q-point mesh to ensure  $\kappa_l$  convergence. It should be noted that non-analytical corrections (NACs), involving Born effective charges and the dielectric tensor, were not included in the present lattice dynamics calculations. Although NAC can affect long-wavelength optical phonons in polar materials, their impact on  $\kappa_l$  is typically minimal.

## Section II. Figures and Table

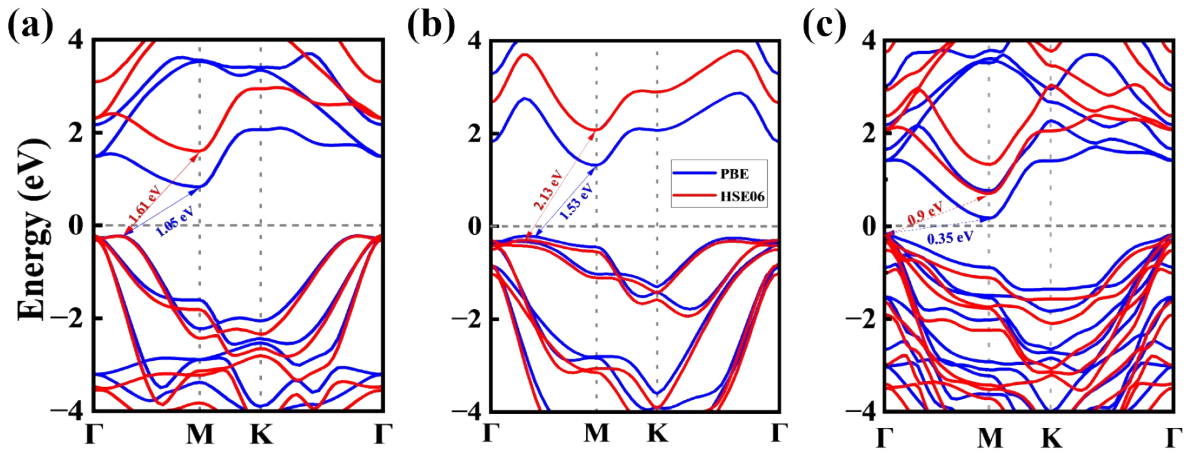

**Figure S1.** Band structures of HfSSe (a), SnSSe (b) and SnSSe/HfSSe (c) monolayers, calculated using PBE and HSE06. The blue line denotes the PBE calculation, and the red line shows the HSE06 calculation.

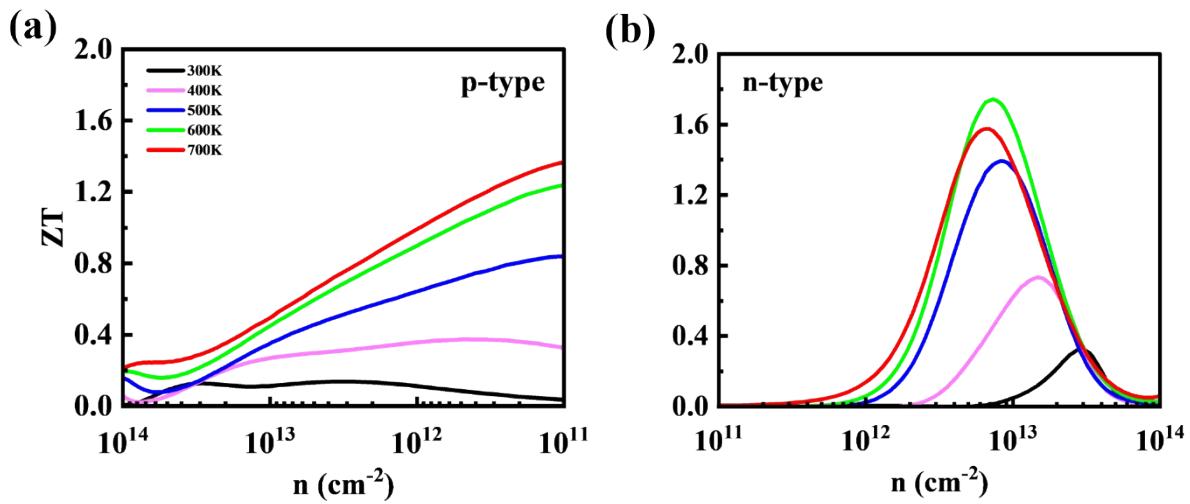

**Figure S2.** ZT versus carrier concentration for p-type (a) and n-type (b) doping, with a  $\tau$  value of  $10^{-13}$  s, at different temperatures (300–700 K).

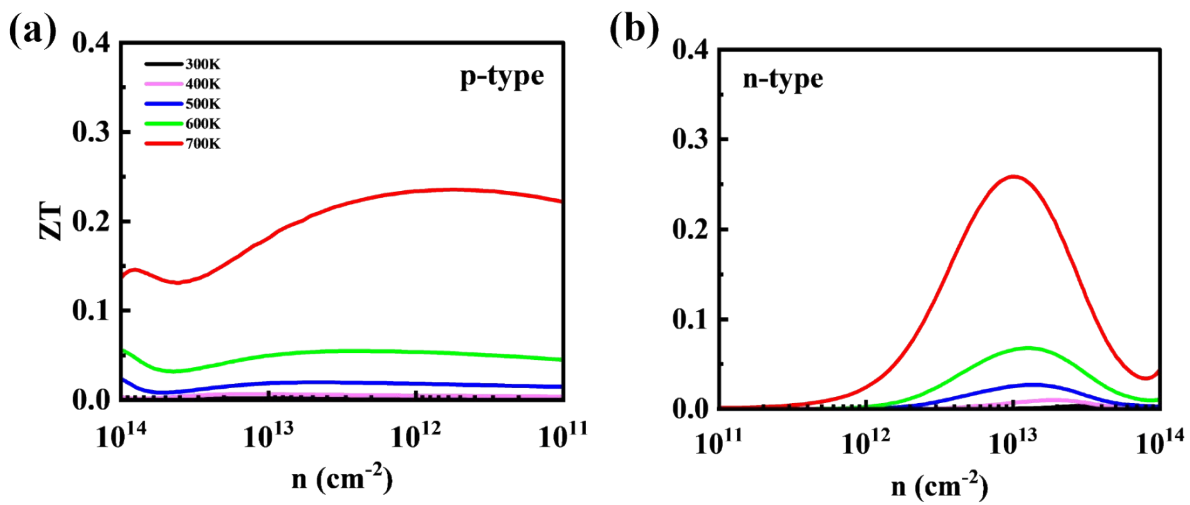

**Figure S3.** ZT versus carrier concentration for p-type (a) and n-type (b) doping, with a  $\tau$  value of  $10^{-15}$  s, at different temperatures (300–700 K).

**Table S1.** Variation of tunneling probability ( $T_B$ ) with barrier width ( $W_B$ ) and effective mass ( $m^*/m_0$ ), demonstrating robust interlayer tunneling behavior.

| $W_B$ (Å) | $m^*/m_0$ | $T_B$ |
|-----------|-----------|-------|
| 0.79      | 0.2       | 59.48 |
| 0.79      | 0.5       | 43.98 |
| 0.79      | 1.0       | 31.29 |
| 0.89      | 0.2       | 55.69 |
| 0.89      | 0.5       | 39.63 |
| 0.89      | 1.0       | 27.01 |
| 0.99      | 0.2       | 52.15 |
| 0.99      | 0.5       | 35.72 |
| 0.99      | 1.0       | 23.32 |
